# Supplementary material
Source: PubMed Central journal article supplement (PMC4204664)
Supplement: supp_mcu131_mcu131supp.pdf [file supp_mcu131_mcu131supp.pdf]

## SUPPLEMENTARY DATA

**Fig S1.** Mean monthly rainfall for each of the sample sites used in this study. Data for Mount Field, Kuringgai, Princess Hills, Yengo, Round Hill and Fowler's Gap are long-term climate averages sourced from nearby (< 10 km) weather stations (Australian Bureau of Meteorology; <http://www.bom.gov.au>); data for Yanachaga (Peru) are based on 7 years of within-site measurements (2003–2009; D. Catchpole, unpublished).

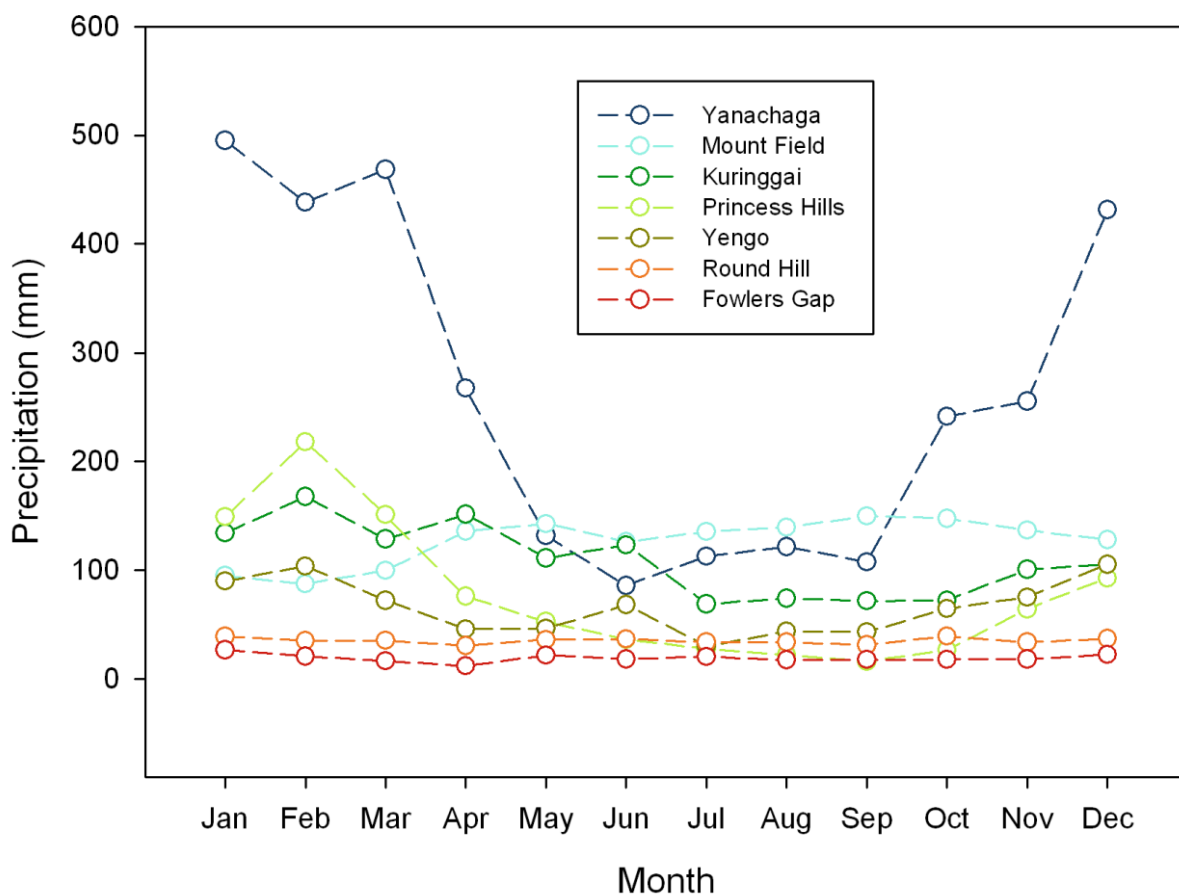

**Fig S2.** Leaf hydraulic vulnerability curves for species measured in the present study. Species plots are arranged by alphabetical order. Vertical dashed lines in each plot indicate the water potential at which point 50% of hydraulic conductance had declined ( $P50_{leaf}$ ).

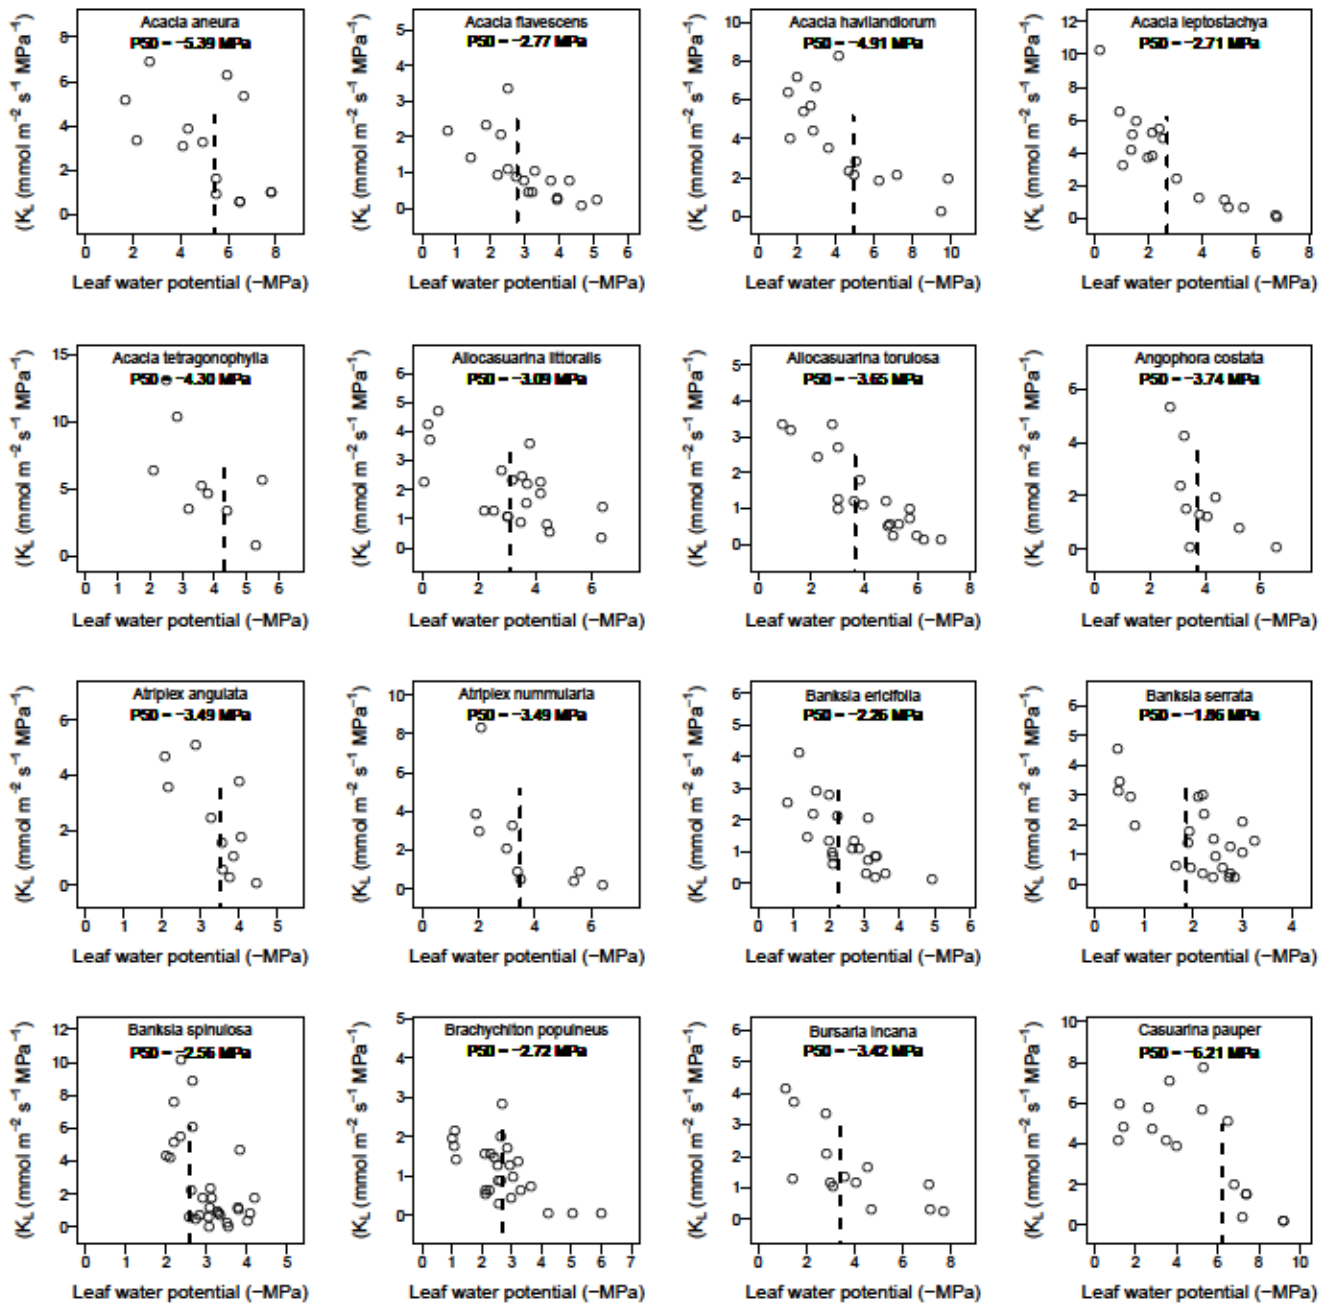

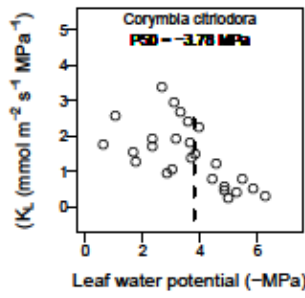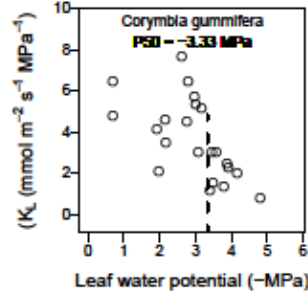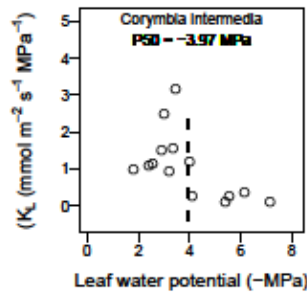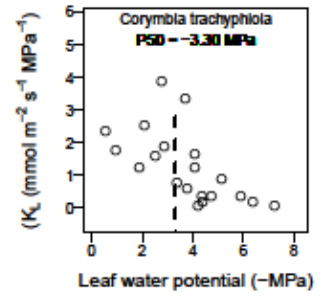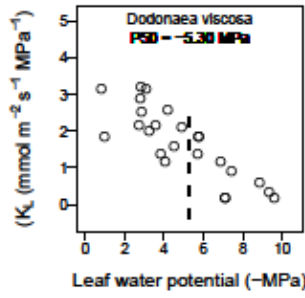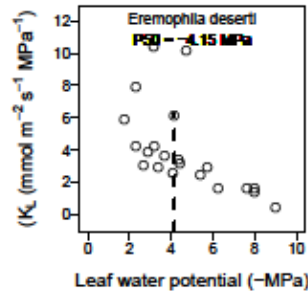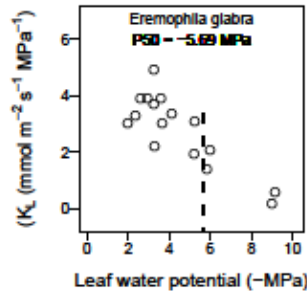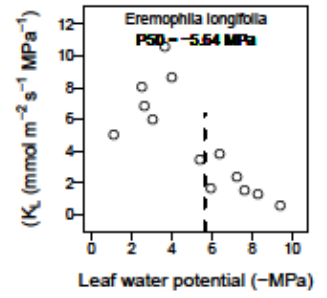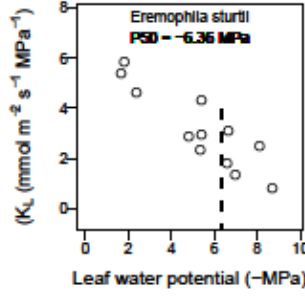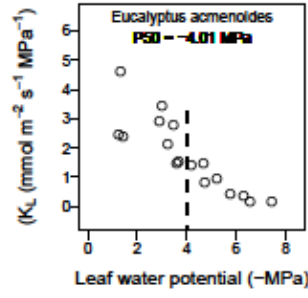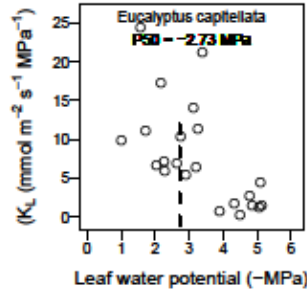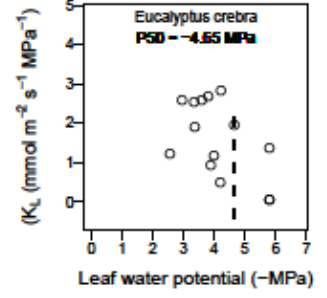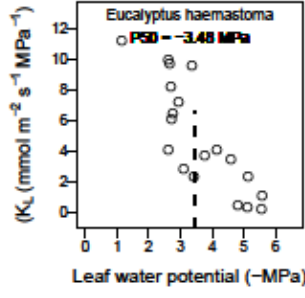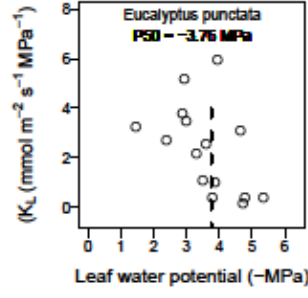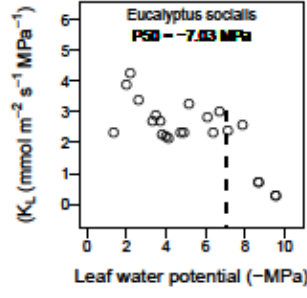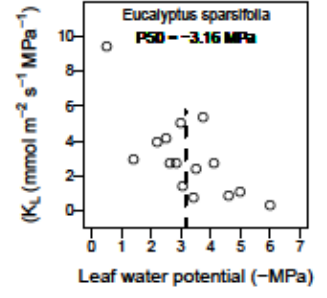

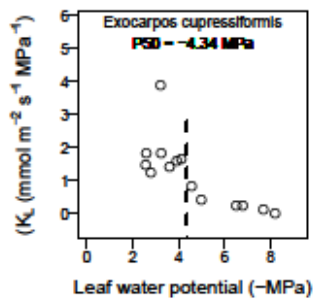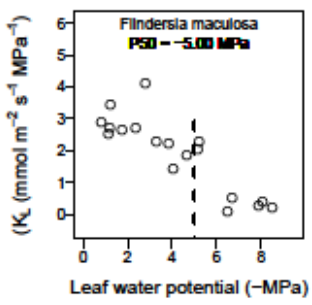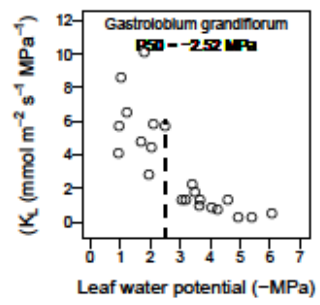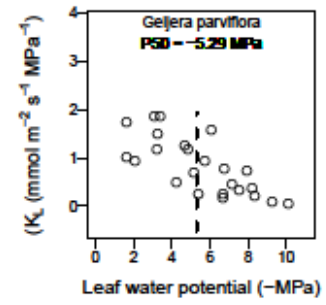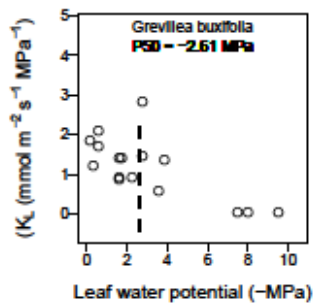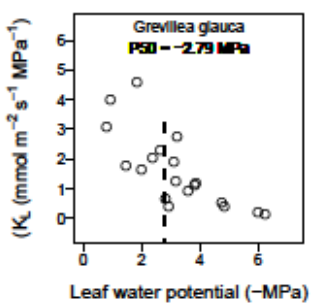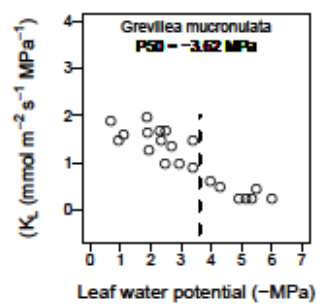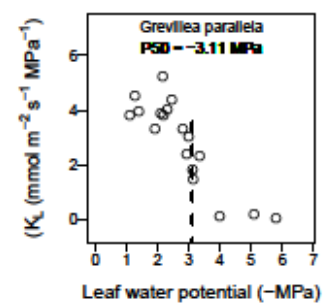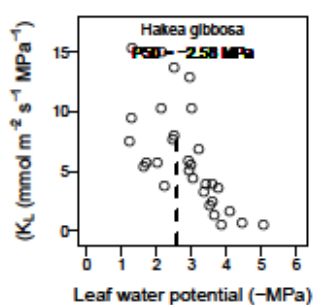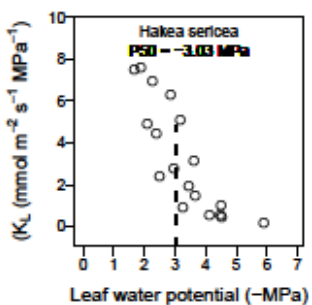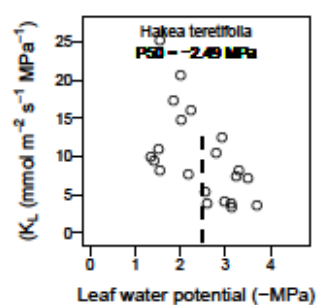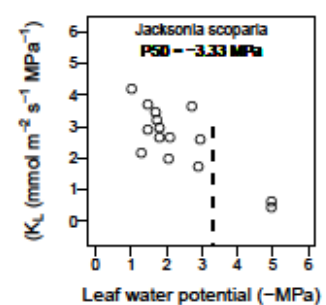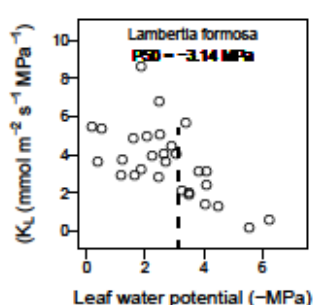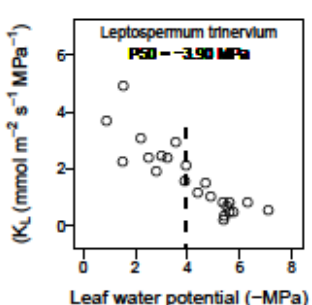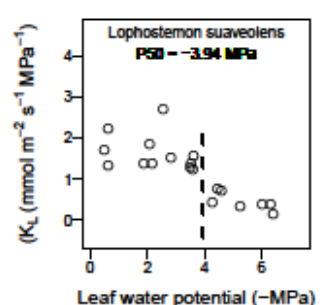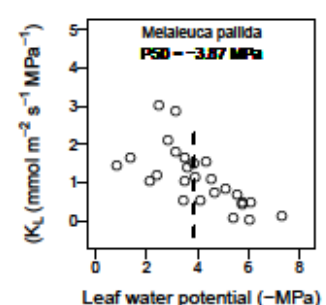

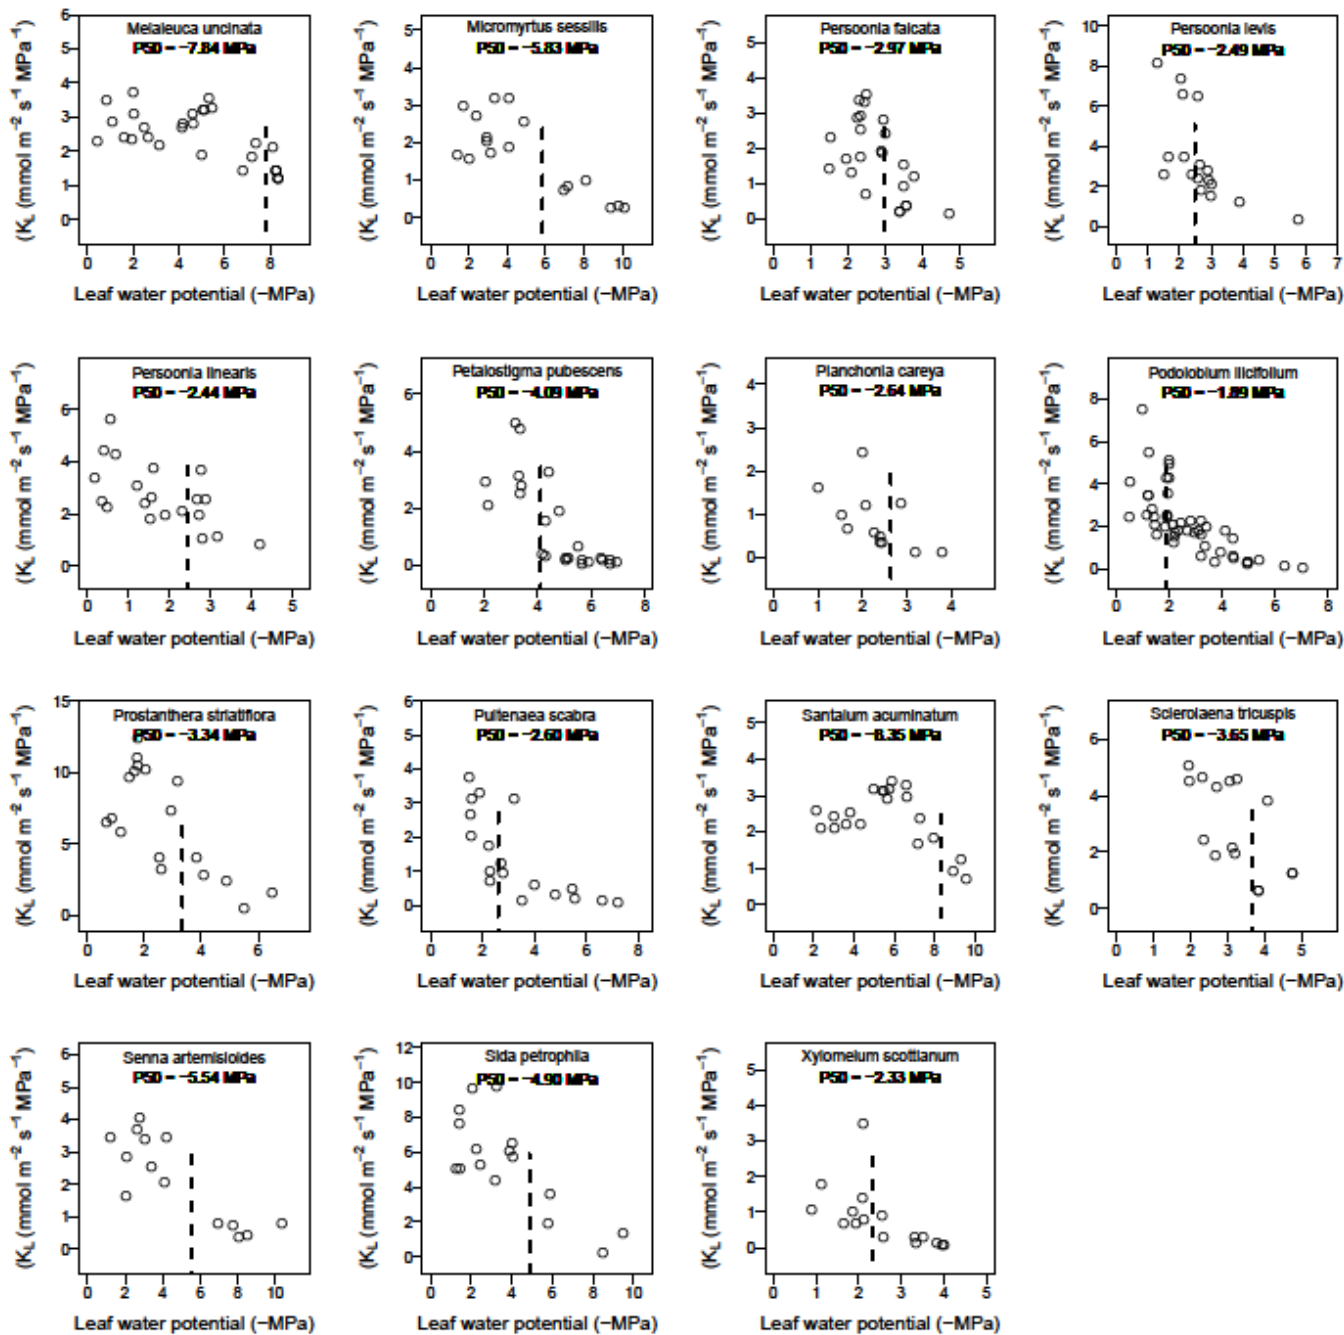

## SUPPLEMENTARY DATA

**Table S1** Taxonomic details and trait data for each species grouped by sample site. Trait data include leaf area (LA), leaf mass per unit area (LMA), and leaf hydraulic vulnerability to drought-induced dysfunction ( $P50_{\text{leaf}}$ ). Data for species from Mount Field and Yanachaga were sourced from Blackman *et al.* (2010) and Blackman *et al.* (2012), respectively.

| Site                                                         | Species                                              | Family                                                  | LA (cm <sup>2</sup> ) | LMA (g m <sup>-2</sup> ) | $P50_{\text{leaf}}$ (MPa) |
|--------------------------------------------------------------|------------------------------------------------------|---------------------------------------------------------|-----------------------|--------------------------|---------------------------|
| Fowlers Gap                                                  | <i>Acacia aneura</i> F.Muell. ex Benth.              | Mimosaceae                                              | 2.00                  | 402.65                   | -5.39                     |
|                                                              | <i>Acacia tetragonophylla</i> F.Muell.               | Fabaceae                                                | 1.34                  | 373.80                   | -4.30                     |
|                                                              | <i>Atriplex angulata</i> Benth.                      | Amaranthaceae                                           | 0.62                  | 43.64                    | -3.49                     |
|                                                              | <i>Atriplex nummularia</i> Lindl.                    | Amaranthaceae                                           | 0.15                  | 136.80                   | -3.49                     |
|                                                              | <i>Casuarina pauper</i> F.Muell. ex L.A.S.Johnson    | Casuarinaceae                                           | 1.00                  | 589.28                   | -6.21                     |
|                                                              | <i>Eremophila longifolia</i> (R.Br.) F.Muell.        | Scrophulariaceae                                        | 1.46                  | 248.46                   | -5.64                     |
|                                                              | <i>Eremophila sturtii</i> R.Br.                      | Scrophulariaceae                                        | 1.41                  | 239.22                   | -6.36                     |
|                                                              | <i>Flindersia maculosa</i> (Lindl.) Benth.           | Rutaceae                                                | 1.23                  | 160.38                   | -5.00                     |
|                                                              | <i>Prostanthera striatiflora</i> F.Muell.            | Lamiaceae                                               | 1.16                  | 150.91                   | -3.34                     |
|                                                              | <i>Sclerolaena tricuspis</i> (F.Muell.) R.H.Anderson | Amaranthaceae                                           | 0.56                  | 112.11                   | -3.65                     |
|                                                              | <i>Sida petrophila</i> F.Muell.                      | Malvaceae                                               | 0.89                  | 193.71                   | -4.90                     |
|                                                              | Ku-ring-gai                                          | <i>Allocasuarina littoralis</i> (Salisb.) L.A.S.Johnson | Casuarinaceae         | 0.72                     | 241.98                    |
| <i>Banksia ericifolia</i> L.f.                               |                                                      | Proteaceae                                              | 0.19                  | 202.59                   | -2.26                     |
| <i>Banksia serrata</i> L.f.                                  |                                                      | Proteaceae                                              | 26.29                 | 262.09                   | -1.86                     |
| <i>Banksia spinulosa</i> Sm.                                 |                                                      | Proteaceae                                              | 1.87                  | 231.93                   | -2.56                     |
| <i>Corymbia gummifera</i> (Gaertn.) K.D.Hill & L.A.S.Johnson |                                                      | Myrtaceae                                               | 20.81                 | 228.07                   | -3.33                     |
| <i>Eucalyptus capitellata</i> Sm.                            |                                                      | Myrtaceae                                               | 13.64                 | 287.66                   | -2.73                     |
| <i>Eucalyptus haemastoma</i> Sm.                             |                                                      | Myrtaceae                                               | 19.35                 | 265.28                   | -3.48                     |
| <i>Grevillea buxifolia</i> (Sm.) R.Br.                       |                                                      | Proteaceae                                              | 0.57                  | 125.13                   | -2.61                     |
| <i>Hakea gibbosa</i> (Sm.) Cav.                              |                                                      | Proteaceae                                              | 0.74                  | 405.00                   | -2.58                     |
| <i>Hakea sericea</i> Schrad. & J.C.Wendl.                    |                                                      | Proteaceae                                              | 0.36                  | 297.90                   | -3.03                     |
| <i>Hakea teretifolia</i> (Salisb.) Britten                   |                                                      | Proteaceae                                              | 0.90                  | 446.97                   | -2.49                     |
| <i>Lambertia formosa</i> Sm.                                 |                                                      | Proteaceae                                              | 1.85                  | 233.52                   | -3.14                     |
| <i>Leptospermum trinervium</i> (Sm.) Joy Thomps.             |                                                      | Myrtaceae                                               | 0.27                  | 131.55                   | -3.90                     |
| <i>Persoonia levis</i> (Cav.) Domin                          |                                                      | Proteaceae                                              | 21.54                 | 202.72                   | -2.49                     |

|                                                 |                                                                              |                 |        |        |       |
|-------------------------------------------------|------------------------------------------------------------------------------|-----------------|--------|--------|-------|
| Princess Hills                                  | <i>Acacia flavescens</i> A.Cunn. ex Benth.                                   | Mimosaceae      | 45.94  | 182.73 | -2.77 |
|                                                 | <i>Acacia leptostachya</i> Benth.                                            | Mimosaceae      | 7.06   | 179.98 | -2.71 |
|                                                 | <i>Allocasuarina torulosa</i> (Aiton) L.A.S.Johnson                          | Casuarinaceae   |        | 264.44 | -3.65 |
|                                                 | <i>Bursaria incana</i> Lindl.                                                | Pittosporaceae  |        |        | -3.42 |
|                                                 | <i>Corymbia citriodora</i> (Hook.) K.D.Hill & L.A.S.Johnson                  | Myrtaceae       | 18.76  | 116.45 | -3.78 |
|                                                 | <i>Corymbia intermedia</i> (R.T.Baker) K.D.Hill & L.A.S.Johnson              | Myrtaceae       | 24.62  | 135.34 | -3.97 |
|                                                 | <i>Corymbia trachyphloia</i> (F.Muell.) K.D.Hill & L.A.S.Johnson             | Myrtaceae       | 13.94  | 145.29 | -3.30 |
|                                                 | <i>Eucalyptus acmenoides</i> Schauer                                         | Myrtaceae       | 23.54  | 206.17 | -4.01 |
|                                                 | <i>Gastrolobium grandiflorum</i> F.Muell.                                    | Fabaceae        | 15.28  | 148.33 | -2.52 |
|                                                 | <i>Grevillea glauca</i> Banks & Sol. ex Knight                               | Proteaceae      | 27.64  | 151.63 | -2.79 |
|                                                 | <i>Grevillea parallela</i> Knight                                            | Proteaceae      | 7.82   | 212.09 | -3.11 |
|                                                 | <i>Lophostemon suaveolens</i> (Sol. ex Gaertn.) Peter G.Wilson & J.T.Waterh. | Myrtaceae       | 26.14  | 136.87 | -3.94 |
|                                                 | <i>Persoonia falcata</i> R.Br.                                               | Proteaceae      | 16.02  | 193.60 | -2.97 |
|                                                 | <i>Petalostigma pubescens</i> Domin                                          | Picrodendraceae | 5.86   | 140.90 | -4.09 |
|                                                 | <i>Planchonia careya</i> (F.Muell.) R.Knuth                                  | Lecythidaceae   | 27.58  | 96.47  | -2.64 |
| <i>Xylomelum scottianum</i> (F.Muell.) F.Muell. | Proteaceae                                                                   | 22.06           | 135.66 | -2.33  |       |
| Round Hill                                      | <i>Acacia havilandiorum</i> Maiden                                           | Mimosaceae      | 0.43   | 430.29 | -4.91 |
|                                                 | <i>Brachychiton populneus</i> (Schott & Endl.) R.Br.                         | Sterculiaceae   | 11.46  | 102.12 | -2.72 |
|                                                 | <i>Dodonaea viscosa</i> subsp. <i>cuneata</i> (Sm.) J.G.West                 | Sapindaceae     | 0.36   | 109.27 | -5.30 |
|                                                 | <i>Eremophila deserti</i> (A.Cunn. ex Benth.) Chinnock                       | Myoporaceae     | 0.76   | 201.90 | -4.15 |
|                                                 | <i>Eremophila glabra</i> (R.Br.) Ostenf.                                     | Myoporaceae     | 0.72   | 159.52 | -5.69 |
|                                                 | <i>Eucalyptus socialis</i> F.Muell. ex Miq.                                  | Myrtaceae       | 8.91   | 307.12 | -7.03 |
|                                                 | <i>Geijera parviflora</i> Lindl.                                             | Rutaceae        | 3.83   | 151.02 | -5.29 |
|                                                 | <i>Melaleuca uncinata</i> R.Br.                                              | Myrtaceae       | 0.18   | 364.78 | -7.84 |
|                                                 | <i>Micromyrtus sessilis</i> J.W.Green                                        | Myrtaceae       | 0.012  | 115.13 | -5.83 |
|                                                 | <i>Santalum acuminatum</i> (R.Br.) A.DC.                                     | Santalaceae     | 5.04   | 203.82 | -8.35 |
|                                                 | <i>Senna artemisioides</i> (Gaudich. ex DC.) Randell                         | Caesalpiaceae   | 0.44   | 387.25 | -5.54 |
| Yengo                                           | <i>Angophora costata</i> (Gaertn.) Britten                                   | Myrtaceae       | 24.56  | 179.13 | -3.74 |
|                                                 | <i>Eucalyptus crebra</i> F.Muell.                                            | Myrtaceae       | 7.72   | 149.48 | -4.65 |
|                                                 | <i>Eucalyptus punctata</i> DC.                                               | Myrtaceae       | 32.11  | 216.55 | -3.76 |
|                                                 | <i>Eucalyptus sparsifolia</i> Blakely                                        | Myrtaceae       | 14.20  | 250.09 | -3.16 |
|                                                 | <i>Exocarpos cupressiformis</i> Labill.                                      | Santalaceae     | 0.35   | 206.34 | -4.34 |
|                                                 | <i>Grevillea mucronulata</i> R.Br.                                           | Proteaceae      | 0.65   | 75.22  | -3.62 |
|                                                 | <i>Jacksonia scoparia</i> R.Br. ex Sm.                                       | Fabaceae        | 0.27   | 227.77 | -3.33 |

|             |                                                            |                    |        |        |       |
|-------------|------------------------------------------------------------|--------------------|--------|--------|-------|
|             | <i>Melaleuca pallida</i> (Bonpl.) Craven                   | Myrtaceae          | 1.25   | 151.44 | -3.87 |
|             | <i>Persoonia linearis</i> Andrews                          | Proteaceae         | 0.90   | 130.27 | -2.44 |
|             | <i>Podolobium ilicifolium</i> (Andrews) Crisp & P.H.Weston | Fabaceae           | 1.33   | 121.53 | -1.89 |
|             | <i>Pultenaea scabra</i> R.Br.                              | Fabaceae           | 0.087  | 92.99  | -2.60 |
| Mount Field | <i>Atherosperma moschatum</i> Labill.                      | Atherospermataceae | 4.20   | 137.19 | -1.48 |
|             | <i>Coprosma nitida</i> Hook.f.                             | Rubiaceae          | 0.22   | 174.68 | -1.95 |
|             | <i>Cyathodes straminea</i> R.Br.                           | Ericaceae          | 0.39   | 199.49 | -2.00 |
|             | <i>Eucalyptus coccifera</i> Hook.f.                        | Myrtaceae          | 7.65   | 253.44 | -2.65 |
|             | <i>Gaultheria hispida</i> R.Br.                            | Ericaceae          | 2.35   | 172.27 | -1.32 |
|             | <i>Hakea lissosperma</i> R.Br.                             | Proteaceae         | 1.38   | 772.43 | -2.85 |
|             | <i>Lomatia polymorpha</i> R.Br.                            | Proteaceae         | 1.05   | 292.76 | -1.57 |
|             | <i>Nothofagus cunninghamii</i> (Hook.) Oerst.              | Nothofagaceae      | 0.39   | 186.72 | -1.70 |
|             | <i>Nothofagus gunnii</i> (Hook.f.) Oerst.                  | Nothofagaceae      | 1.63   | 102.00 | -1.53 |
|             | <i>Olearia pinifolia</i> (Hook.f.) Benth.                  | Asteraceae         | 0.46   | 314.16 | -1.71 |
|             | <i>Orites diversifolius</i> R.Br.                          | Proteaceae         | 1.93   | 380.85 | -1.25 |
|             | <i>Pittosporum bicolor</i> Hook.                           | Pittosporaceae     | 1.38   | 251.52 | -1.87 |
|             | <i>Richea scoparia</i> Hook.f.                             | Ericaceae          | 2.05   | 201.24 | -1.41 |
|             | <i>Tasmannia lanceolata</i> (Poir.) A.C.Sm.                | Winteraceae        | 1.11   | 211.97 | -1.56 |
|             | <i>Telopea truncata</i> (Labill.) R.Br.                    | Proteaceae         | 5.55   | 243.32 | -1.58 |
| Yanachaga   | <i>Cedrela montana</i> Moritz ex Turez                     | Meliaceae          | 53.96  | 108.42 | -1.36 |
|             | <i>Clusia ducuoides</i> Engl.                              | Clusiaceae         | 26.09  | 187.68 | -1.25 |
|             | <i>Clusia elliptica</i> Kunth                              | Clusiaceae         | 37.54  | 194.52 | -1.19 |
|             | <i>Eugenia pubescens</i> (Kunth) DC.                       | Myrtaceae          | 25.54  | 161.92 | -1.55 |
|             | <i>Freziera uncinata</i> A.L. Weitzman                     | Pentaphragaceae    | 5.68   | 153.68 | -1.20 |
|             | <i>Hedyosmum anisodorum</i> Todzia                         | Chloranthaceae     | 69.26  | 93.89  | -1.14 |
|             | <i>Hedyosmum lechleri</i> Solms                            | Chloranthaceae     | 27.22  | 116.45 | -1.09 |
|             | <i>Licaria subsessilis</i> Werff                           | Lauraceae          | 21.77  | 162.38 | -1.52 |
|             | <i>Miconia adinantha</i> Wurdack                           | Melastomataceae    | 104.49 | 156.90 | -1.91 |
|             | <i>Miconia aprica</i> Gleason                              | Melastomataceae    | 33.44  | 107.04 | -1.55 |
|             | <i>Miconia barbeyana</i> Cogn                              | Melastomataceae    | 49.44  | 102.41 | -1.68 |
|             | <i>Myrsine pellucida</i> (Ruiz & Pav) Spreng.              | Myrsinaceae        | 71.51  | 138.48 | -1.48 |
|             | <i>Weinmannia lechleriana</i> Engl.                        | Cunoniaceae        | 39.61  | 129.99 | -1.31 |
|             | <i>Weinmannia microphylla</i> Kunth                        | Cunoniaceae        | 6.34   | 100.81 | -1.03 |



**Table S2.** Correlation coefficients ( $r$ ) of least-square regressions between leaf hydraulic vulnerability to drought-induced dysfunction ( $P50_{\text{leaf}}$ ) and climate parameters related to water availability across species' distributions, analysed by site. Climate parameters are: mean annual precipitation (MAP); 5<sup>th</sup> percentile of mean annual precipitation; 95<sup>th</sup> percentile of aridity index (AI). Significance levels of regressions are indicated (ns =  $P > 0.05$ ; \*\* $P < 0.001$ ; \*\*\* $P < 0.0001$ ).

| Site           | MAP                 | 5 <sup>th</sup> percentile MAP | 95 <sup>th</sup> percentile AI |
|----------------|---------------------|--------------------------------|--------------------------------|
| Mount Field    | 0.75***             | 0.73**                         | 0.71**                         |
| Kur-ing-gai    | 0.34 <sup>ns</sup>  | 0.28 <sup>ns</sup>             | 0.43 <sup>ns</sup>             |
| Princess Hills | -0.08 <sup>ns</sup> | -0.07 <sup>ns</sup>            | -0.28 <sup>ns</sup>            |
| Yengo          | 0.32 <sup>ns</sup>  | 0.38 <sup>ns</sup>             | 0.29 <sup>ns</sup>             |
| Round Hill     | 0.50 <sup>ns</sup>  | 0.43 <sup>ns</sup>             | 0.36 <sup>ns</sup>             |
| Fowler's Gap   | 0.56 <sup>ns</sup>  | 0.39 <sup>ns</sup>             | 0.37 <sup>ns</sup>             |
